# Supplementary material for: Texture Analysis of Chinese Dried Noodles during Drying Based on Acoustic–Mechanical Detection Methods
Source: MDPI journal article supplement (doi:10.3390/foods13020268), 2024-01-15
Supplement: s1 [file s1]

Table S1. Autocorrelation coefficient and autocorrelation time results based on acoustic characteristic spectrograms

| drying temperature/°C | Drying time/min | %RH | autocorrelation coefficient | Autocorrelation time/s |
|-----------------------|-----------------|-----|-----------------------------|------------------------|
| 40°C                  | 50              | 65  | 0.006767                    | 1.04±0.03 <sup>a</sup> |
|                       |                 | 75  | ——                          | ——                     |
|                       |                 | 85  | ——                          | ——                     |
|                       | 100             | 65  | 0.007124                    | 1.01±0.06 <sup>a</sup> |
|                       |                 | 75  | 0.007998                    | 1.02±0.03 <sup>a</sup> |
|                       |                 | 85  | ——                          | ——                     |
|                       | 150             | 65  | 0.007721                    | 1.04±0.03 <sup>a</sup> |
|                       |                 | 75  | 0.006983                    | 1.07±0.03 <sup>a</sup> |
|                       |                 | 85  | ——                          | ——                     |
|                       | 200             | 65  | 0.007533                    | 0.97±0.06 <sup>a</sup> |
|                       |                 | 75  | ——                          | 1.09±0.03 <sup>a</sup> |
|                       |                 | 85  | ——                          | ——                     |
|                       | 250             | 65  | 0.006401                    | 0.91±0.01 <sup>a</sup> |
|                       |                 | 75  | 0.007114                    | 1.04±0.01 <sup>a</sup> |
|                       |                 | 85  | 0.006762                    | 1.08±0.02 <sup>a</sup> |
| 60°C                  | 300             | 65  | 0.007536                    | 0.93±0.03 <sup>a</sup> |
|                       |                 | 75  | 0.006734                    | 1.04±0.01 <sup>a</sup> |
|                       |                 | 85  | 0.006946                    | 1.08±0.02 <sup>a</sup> |
|                       | 50              | 65  | 0.007351                    | 0.98±0.05 <sup>a</sup> |
|                       |                 | 75  | 0.007166                    | 1.02±0.05 <sup>a</sup> |
|                       |                 | 85  | ——                          | ——                     |
|                       | 100             | 65  | 0.00723                     | 0.94±0.01 <sup>a</sup> |
|                       |                 | 75  | 0.00725                     | 1.02±0.01 <sup>a</sup> |
|                       |                 | 85  | 0.007219                    | 1.04±0.03 <sup>a</sup> |
|                       | 150             | 65  | 0.007599                    | 0.94±0.01 <sup>a</sup> |
|                       |                 | 75  | 0.007381                    | 1.03±0.05 <sup>a</sup> |
|                       |                 | 85  | 0.007347                    | 1.04±0.06 <sup>a</sup> |
|                       | 200             | 65  | 0.007497                    | 0.95±0.03 <sup>a</sup> |
|                       |                 | 75  | 0.007179                    | 0.99±0.04 <sup>a</sup> |
|                       |                 | 85  | 0.006119                    | 1.04±0.03 <sup>a</sup> |
| 80°C                  | 250             | 65  | 0.007871                    | 0.95±0.03 <sup>a</sup> |
|                       |                 | 75  | 0.006724                    | 0.95±0.02 <sup>a</sup> |
|                       |                 | 85  | 0.007317                    | 1.04±0.01 <sup>a</sup> |
|                       | 300             | 65  | 0.007143                    | 0.94±0.03 <sup>a</sup> |
|                       |                 | 75  | 0.006126                    | 0.92±0.01 <sup>a</sup> |
|                       |                 | 85  | 0.006734                    | 1.01±0.07 <sup>a</sup> |
|                       | 100             | 65  | 0.007465                    | 0.96±0.03 <sup>a</sup> |
|                       |                 | 75  | 0.007356                    | 0.95±0.01 <sup>a</sup> |
|                       |                 | 85  | 0.007363                    | 0.97±0.02 <sup>a</sup> |
|                       | 50              | 65  | 0.007392                    | 0.94±0.00 <sup>a</sup> |
|                       |                 | 75  | 0.007451                    | 0.95±0.01 <sup>a</sup> |

|  |     |    |          |                        |
|--|-----|----|----------|------------------------|
|  | 150 | 85 | 0.007477 | 0.96±0.06 <sup>a</sup> |
|  |     | 65 | 0.007655 | 0.95±0.03 <sup>a</sup> |
|  |     | 75 | 0.007443 | 0.94±0.03 <sup>a</sup> |
|  | 200 | 85 | 0.007385 | 0.94±0.01 <sup>a</sup> |
|  |     | 65 | 0.007237 | 0.91±0.03 <sup>a</sup> |
|  |     | 75 | 0.007228 | 0.95±0.03 <sup>a</sup> |
|  | 250 | 85 | 0.007232 | 0.96±0.03 <sup>a</sup> |
|  |     | 65 | 0.006394 | 0.95±0.01 <sup>a</sup> |
|  |     | 75 | 0.007271 | 0.95±0.01 <sup>a</sup> |
|  | 300 | 85 | 0.006784 | 0.95±0.03 <sup>a</sup> |
|  |     | 65 | 0.007486 | 0.96±0.02 <sup>a</sup> |
|  |     | 75 | 0.007245 | 0.94±0.03 <sup>a</sup> |
|  |     | 85 | 0.007363 | 0.93±0.02 <sup>a</sup> |
